# Supplementary material for: Iron(ii) spin crossover complexes with diaminonaphthalene-based Schiff base-like ligands: 1D coordination polymers
Source: Royal Society of Chemistry journal article supplement (doi:10.1039/c5nj02470f), 2016-01-01

## Iron(II) spin crossover complexes with diamidonaphthalene-based Schiff base-like ligands: 1D coordination polymers.

Charles Lochenie<sup>a</sup>, Andreas Gebauer<sup>a</sup>, Ottokar Klimm<sup>a</sup>, Florian Puchtler<sup>b</sup> and Birgit Weber<sup>a\*</sup>

### SUPPORTING INFORMATION

Figure S1: TGA measurements of samples **1**, **5**, **10**, **11**, and **16**.

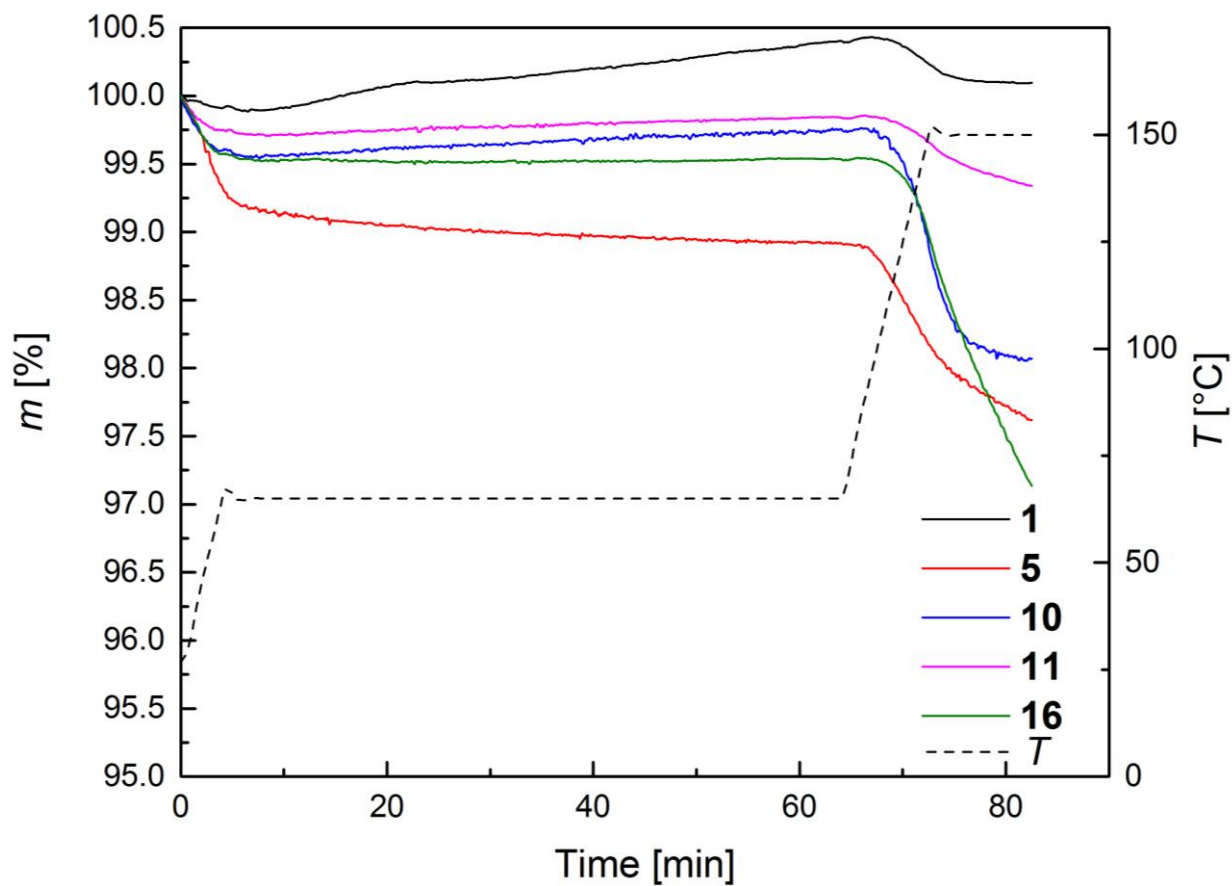

**Figure S2:** Magnetic susceptibility measurements of compounds **2**, **6**, **7**, **8**, **9** and **12**, displayed between 10 K and 300 K.

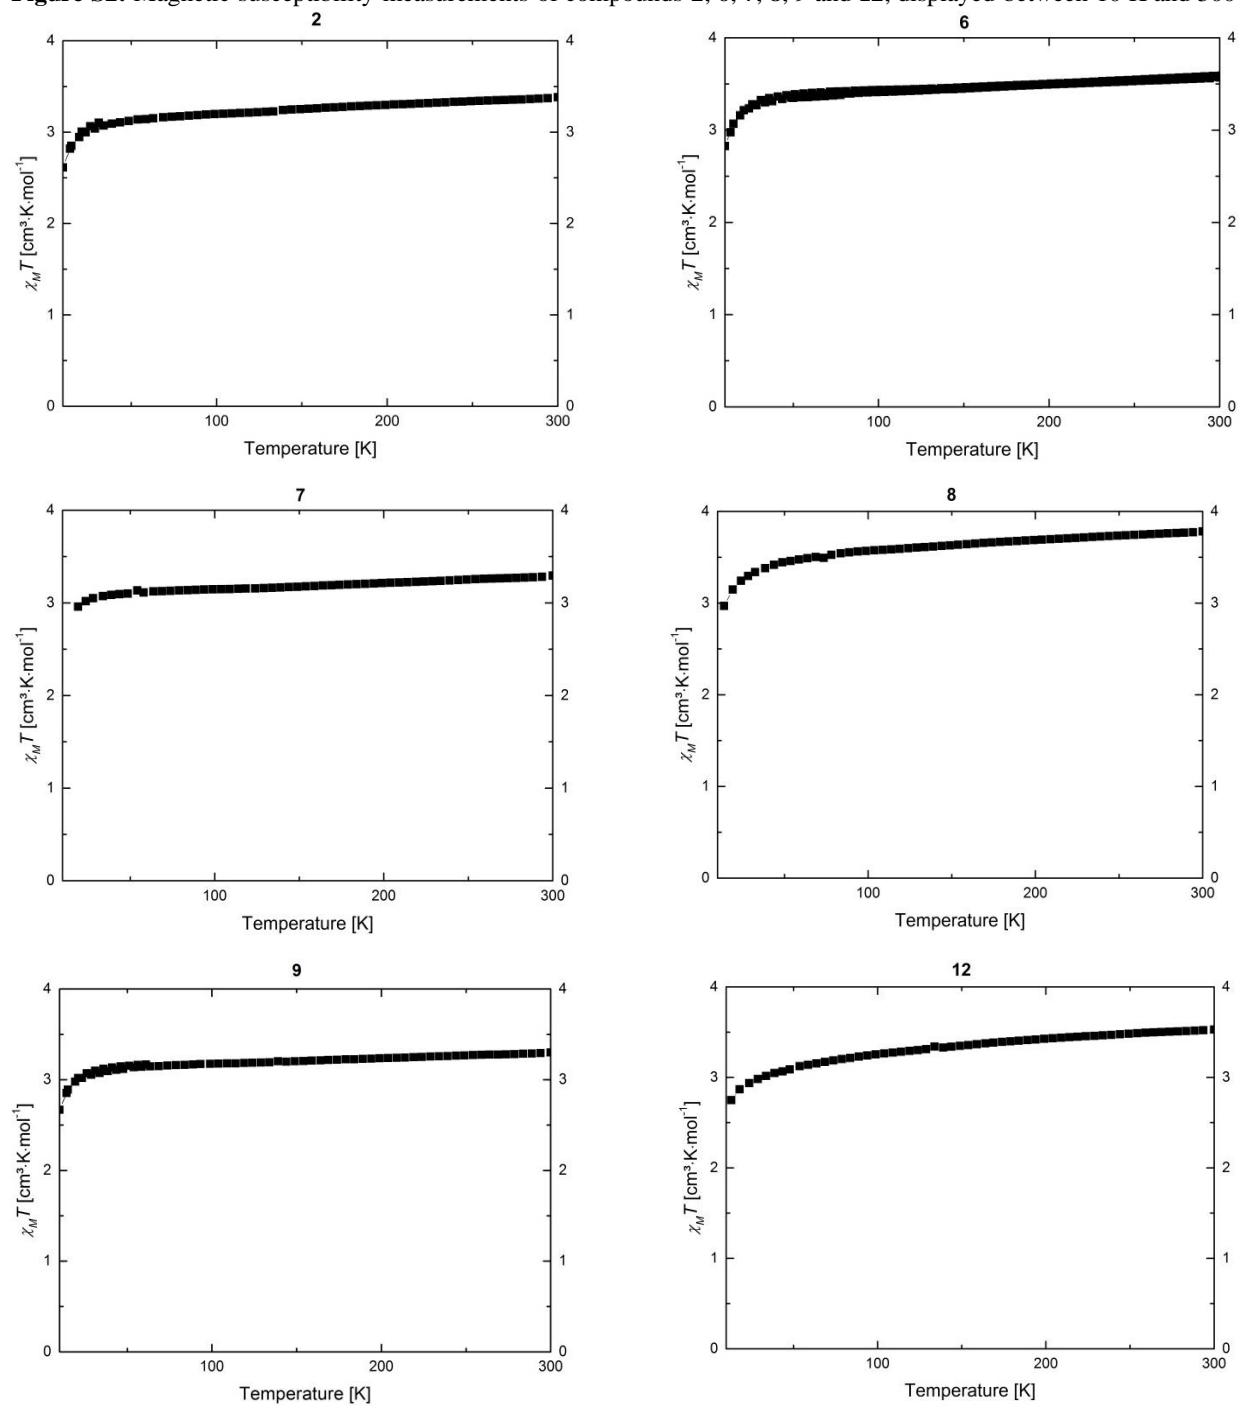

**Figure S3:** Magnetic susceptibility measurements of compounds **3**, **4**, **13**, and **15**, displayed between 10 K and 300 K.

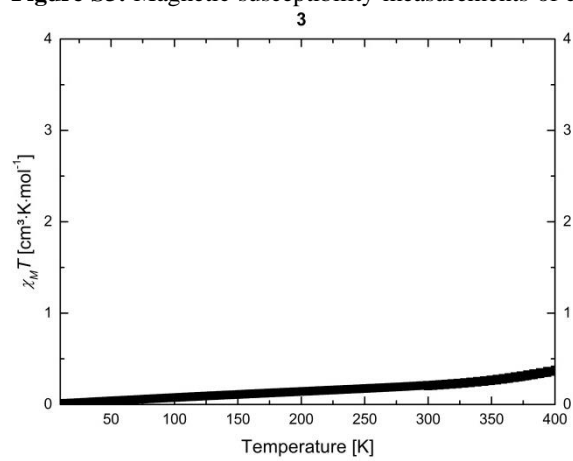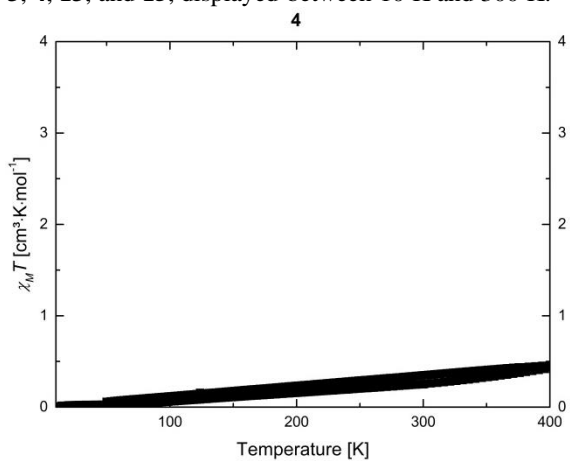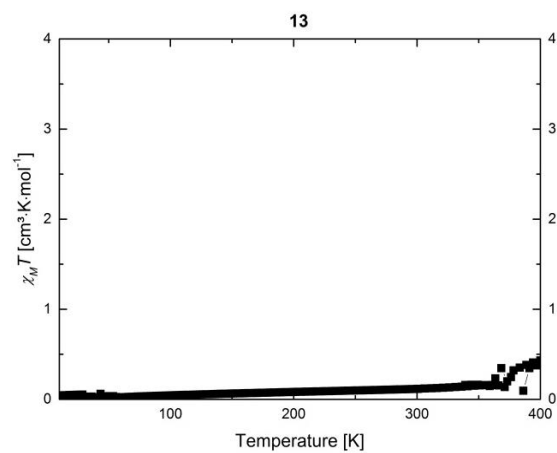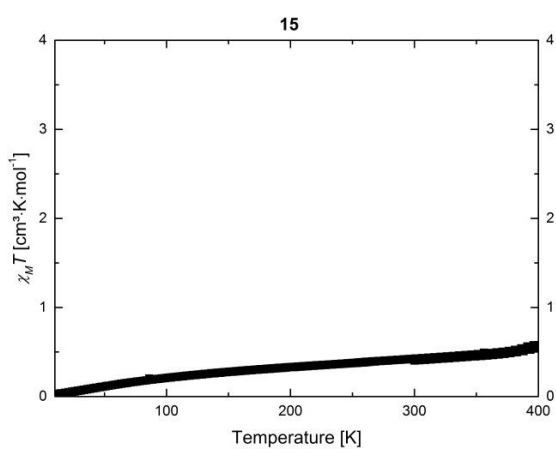

**Figure S4:** Powder diffraction patterns of samples 2, 3, 4, 6, 7, 8, 9, 12, 13, and 15 at room temperature.

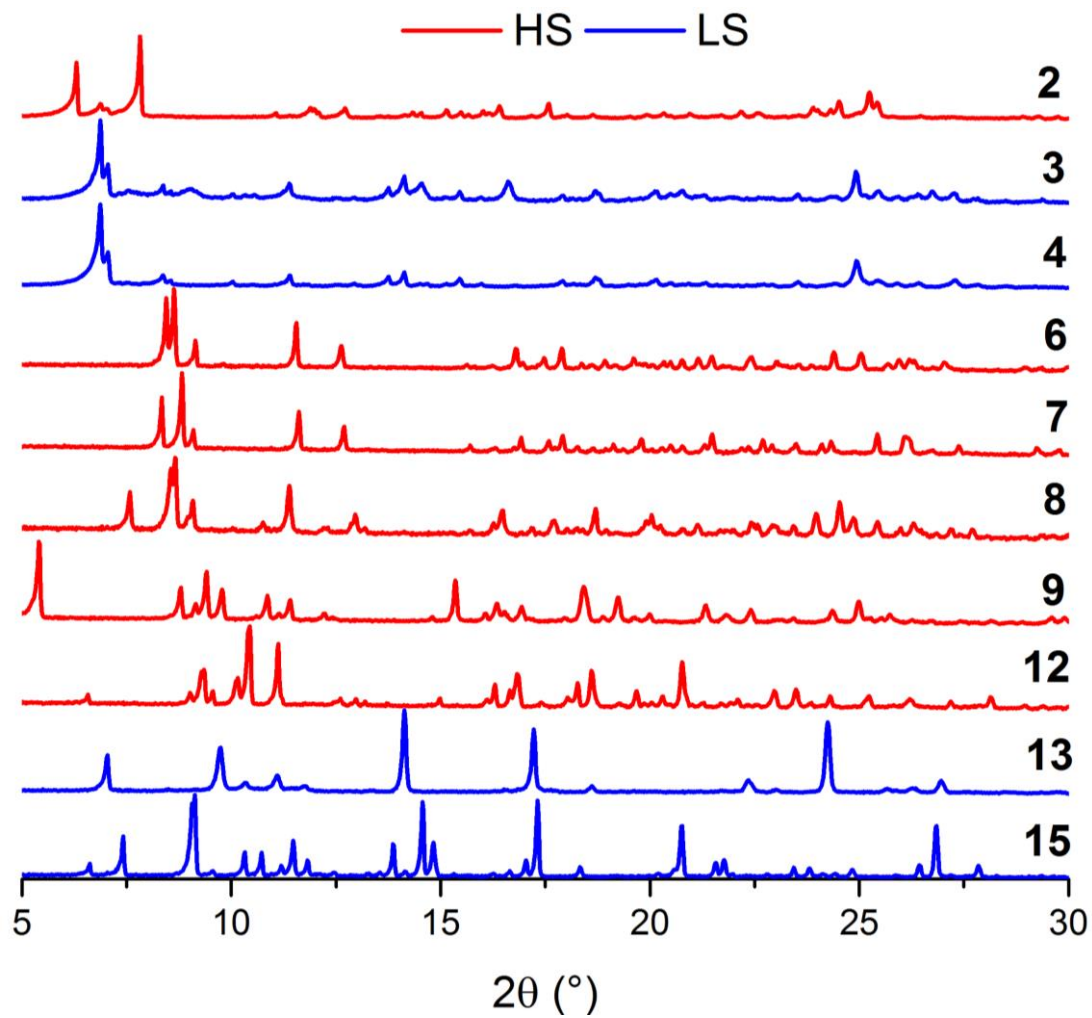

**Figure S5:** DSC plots of samples **1**, **5**, **10**, **11**, and **16**. Peak temperatures are indicated on the graphs, as well as the scanning direction.

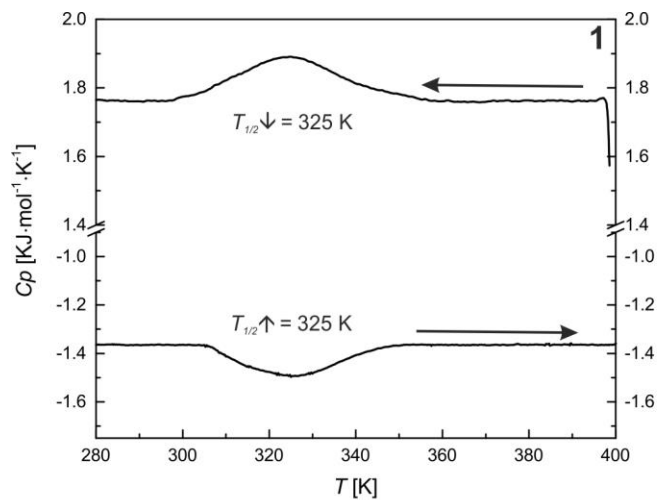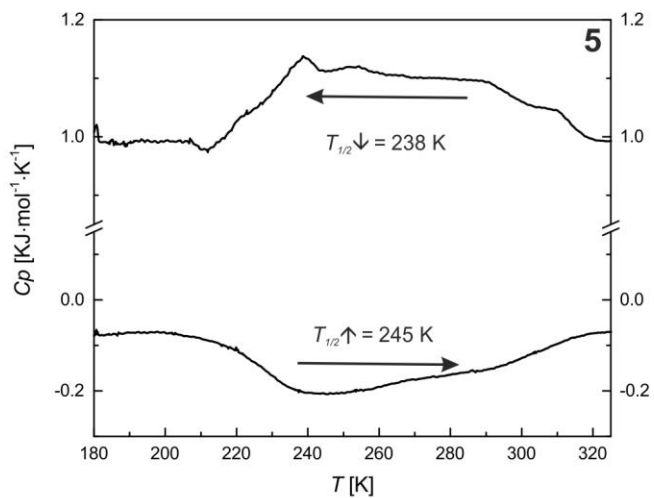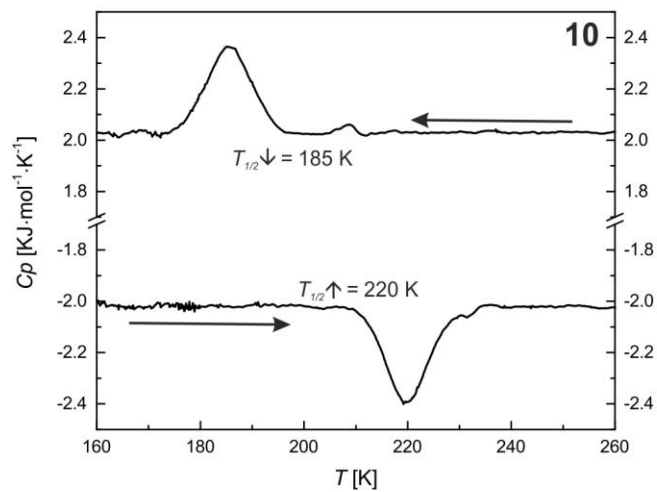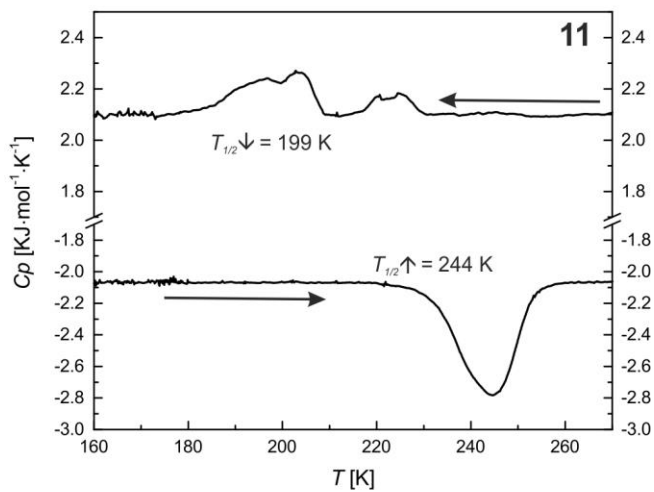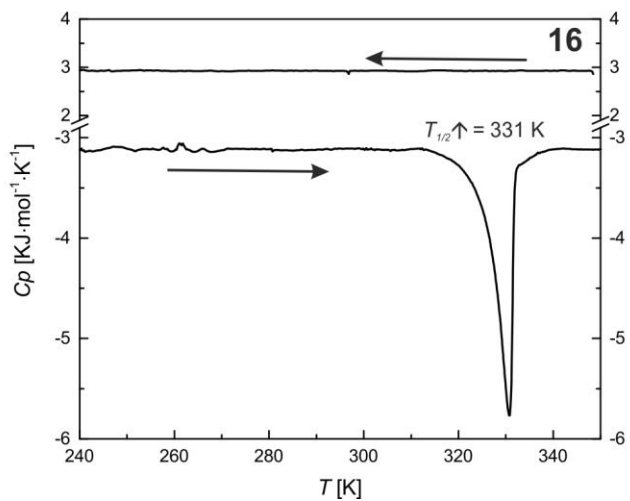

Figure S6: Scanning electron microscopy images of samples 1–4.

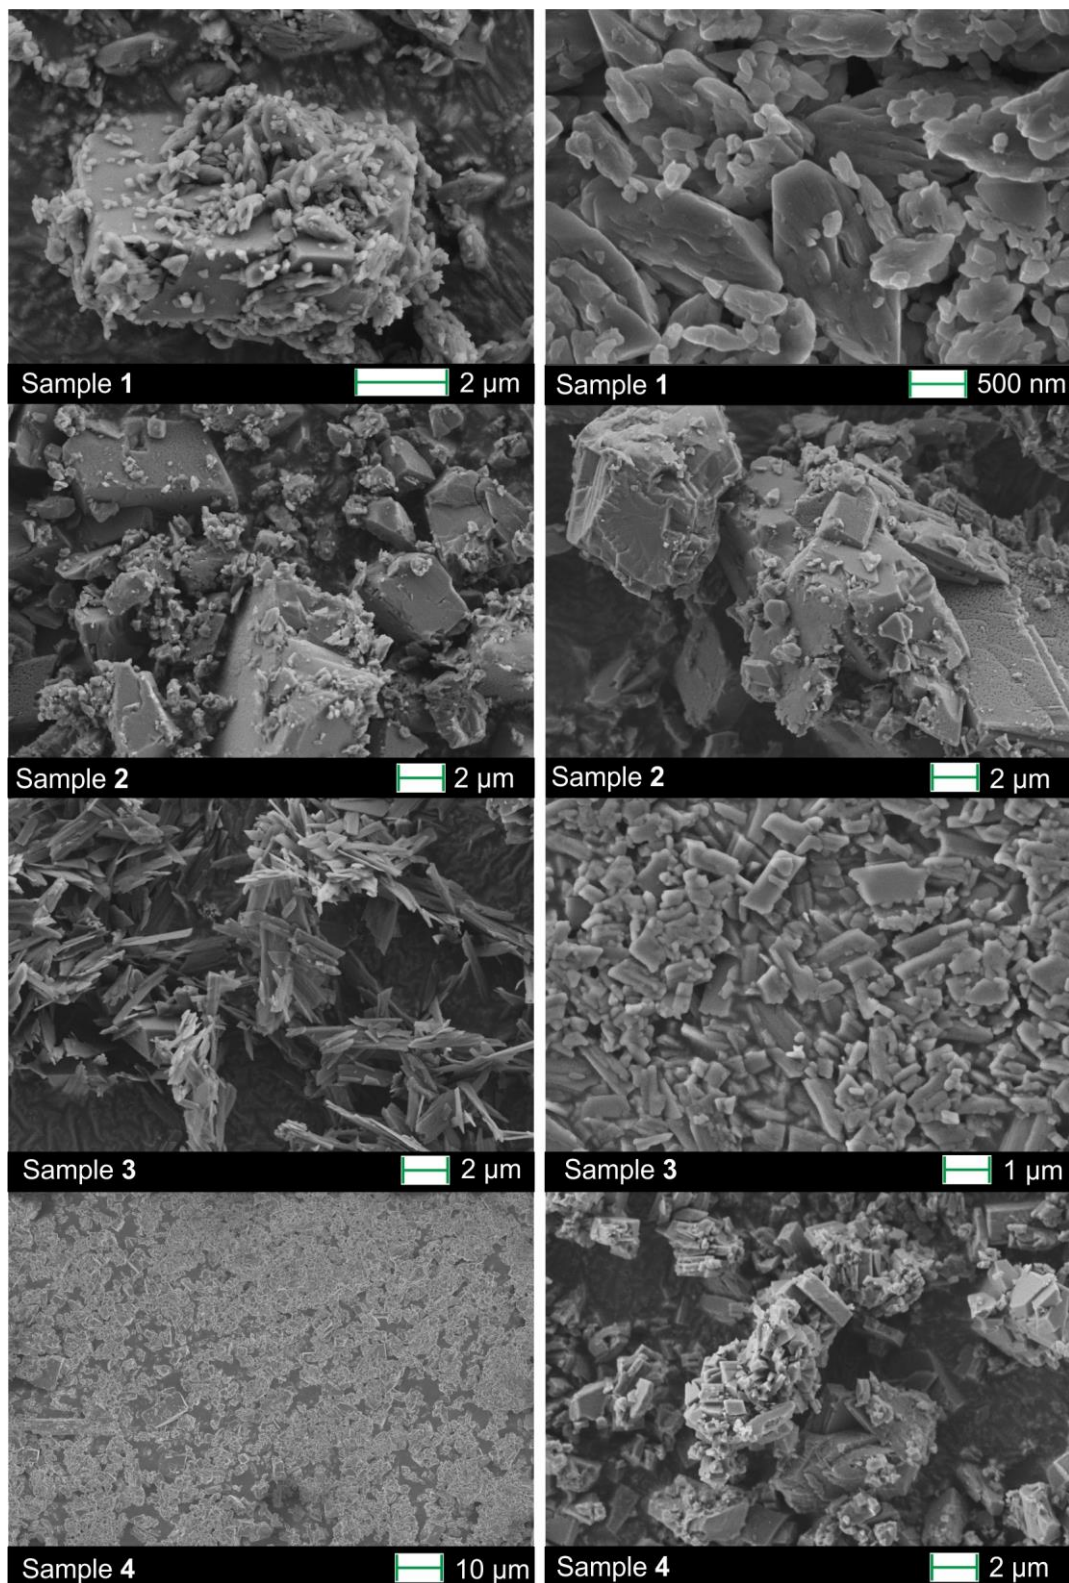



**Figure S7:** Scanning electron microscopy images of samples 5–8.

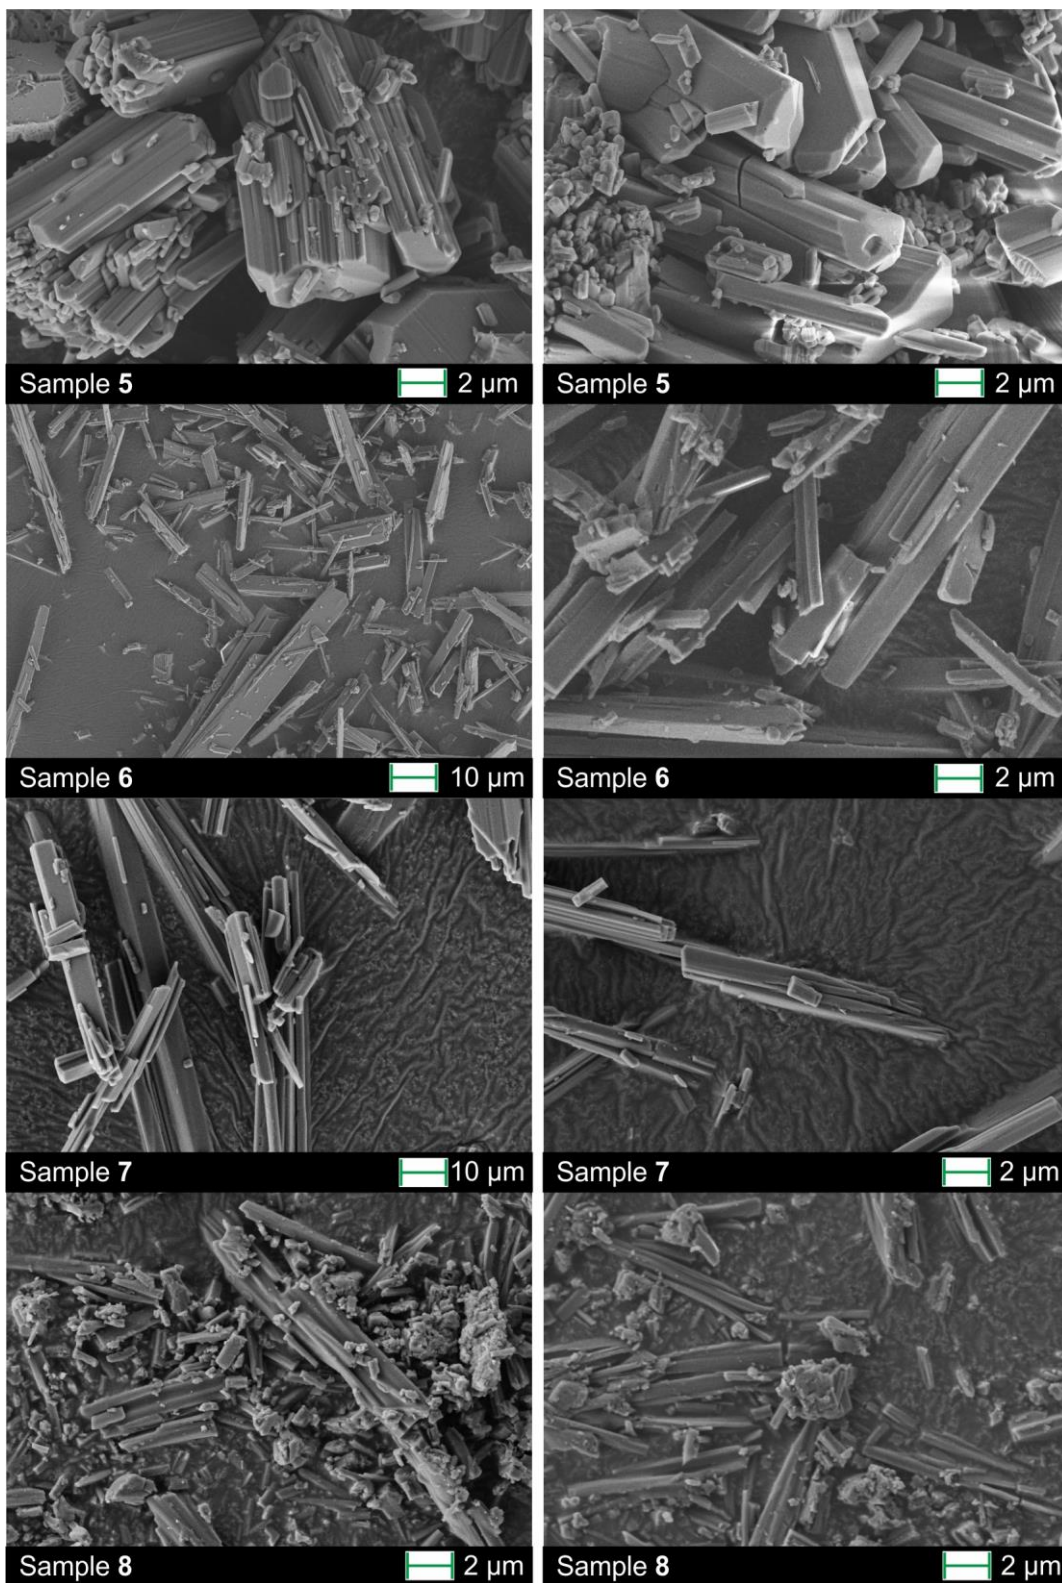

Figure S8: Scanning electron microscopy images of samples 9–12.

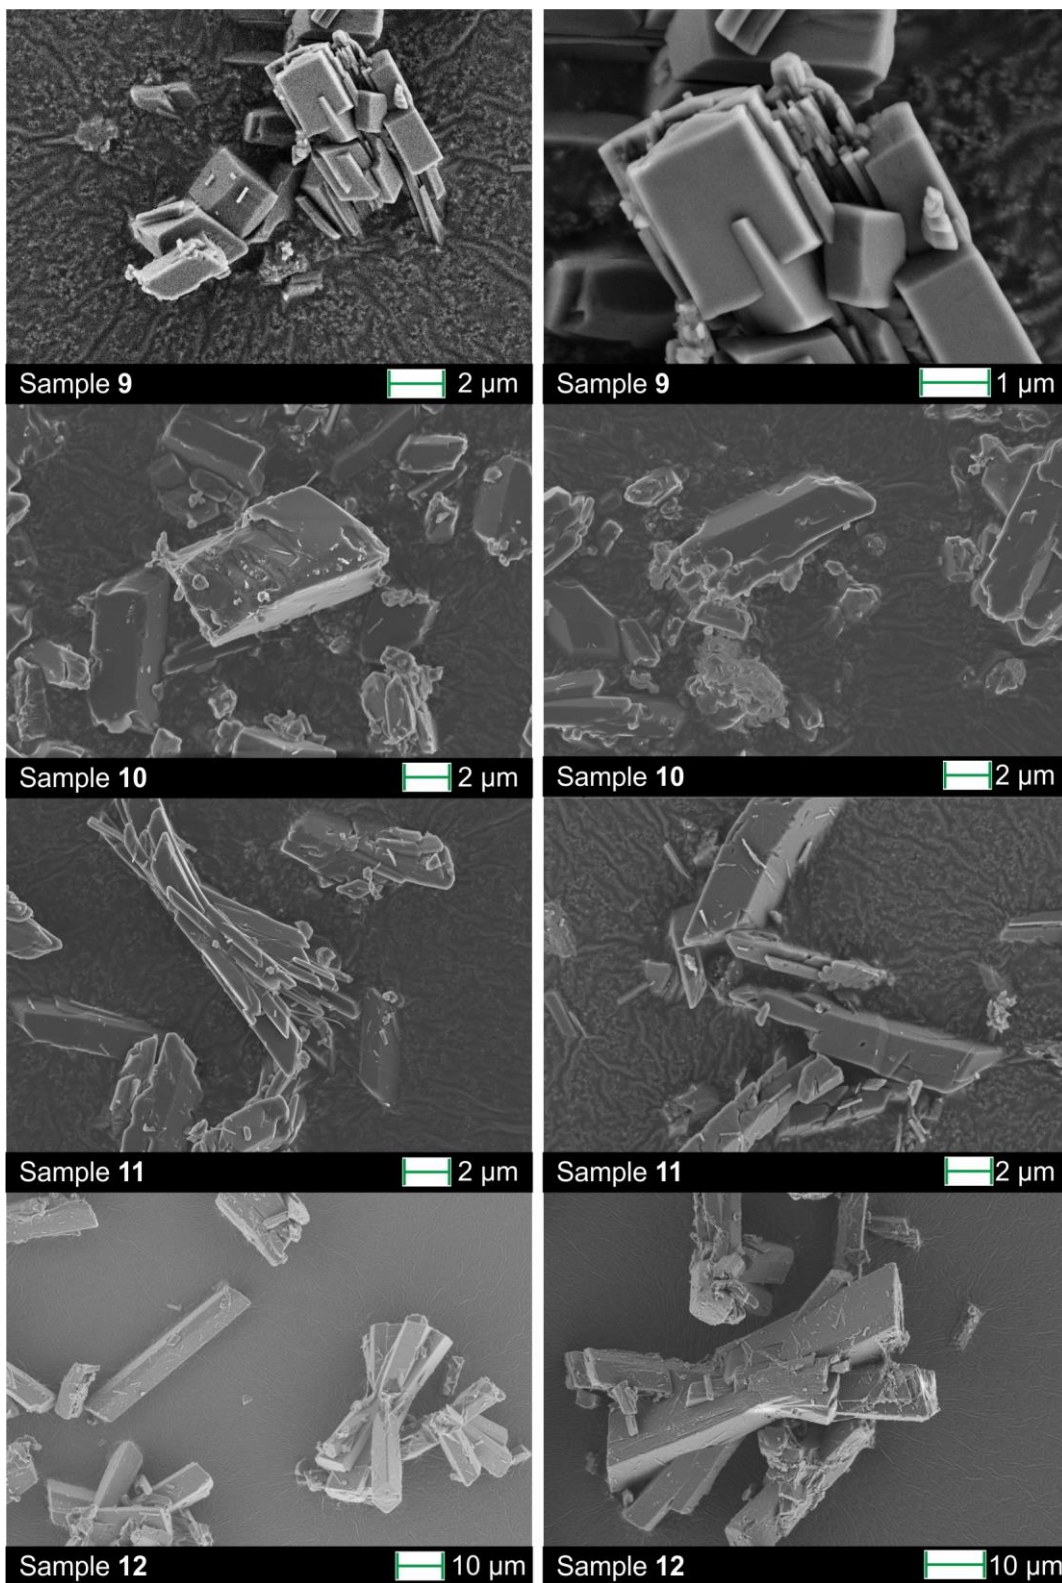



**Figure S9:** Scanning electron microscopy images of samples 13–16.

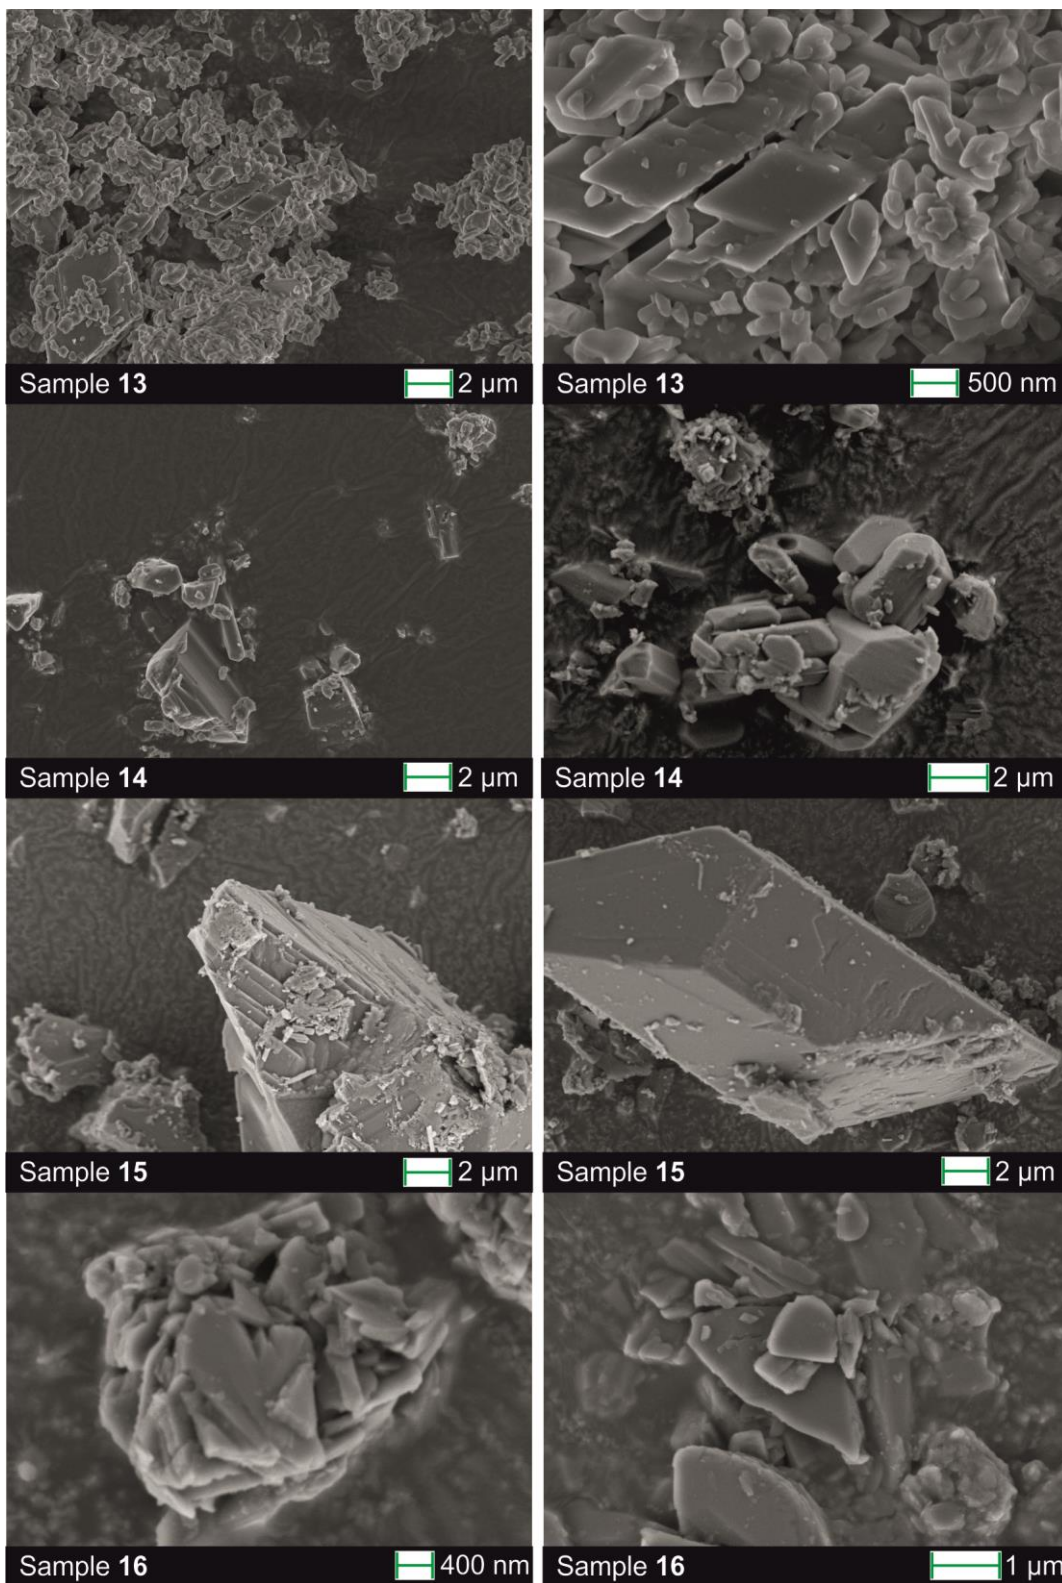

**Figure S10:** Mössbauer spectra of samples 1–6 at room temperature.

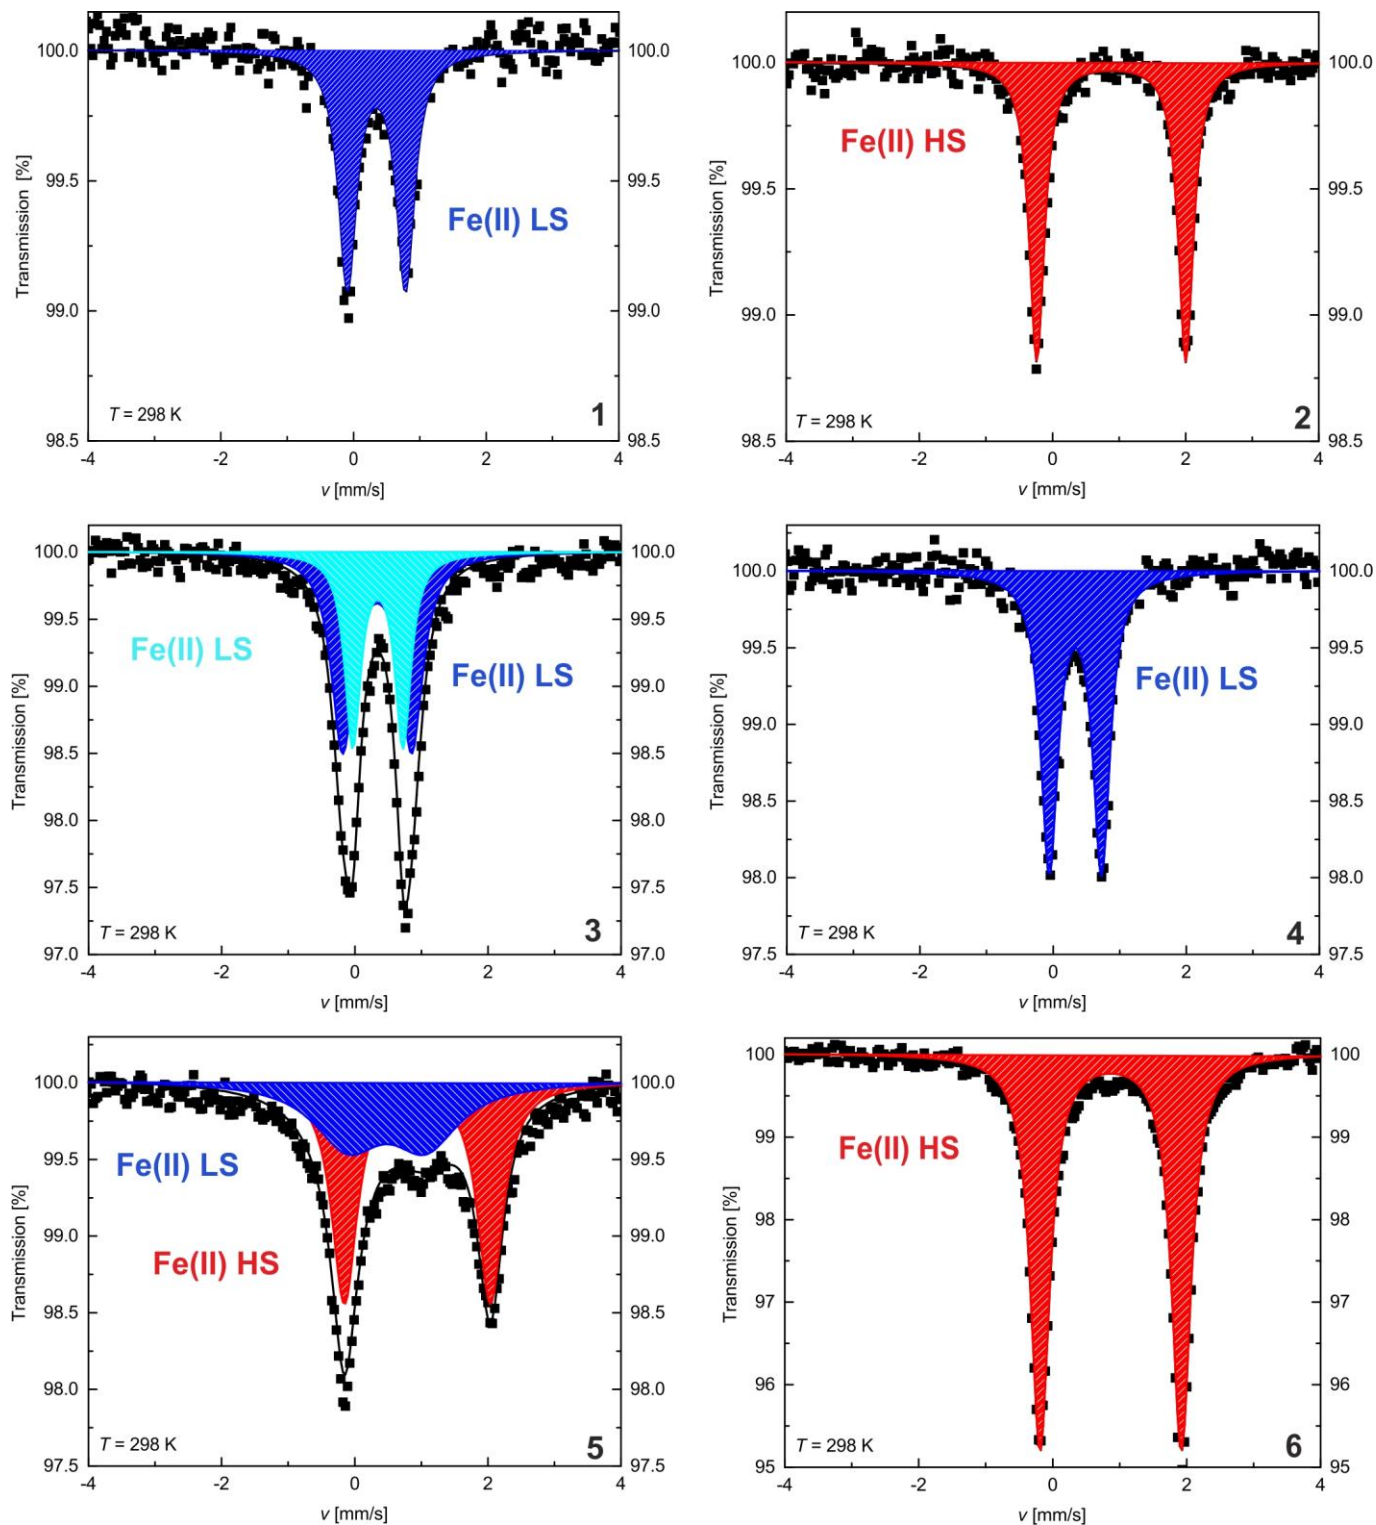

Figure S11: Mössbauer spectra of samples 7–12 at room temperature.

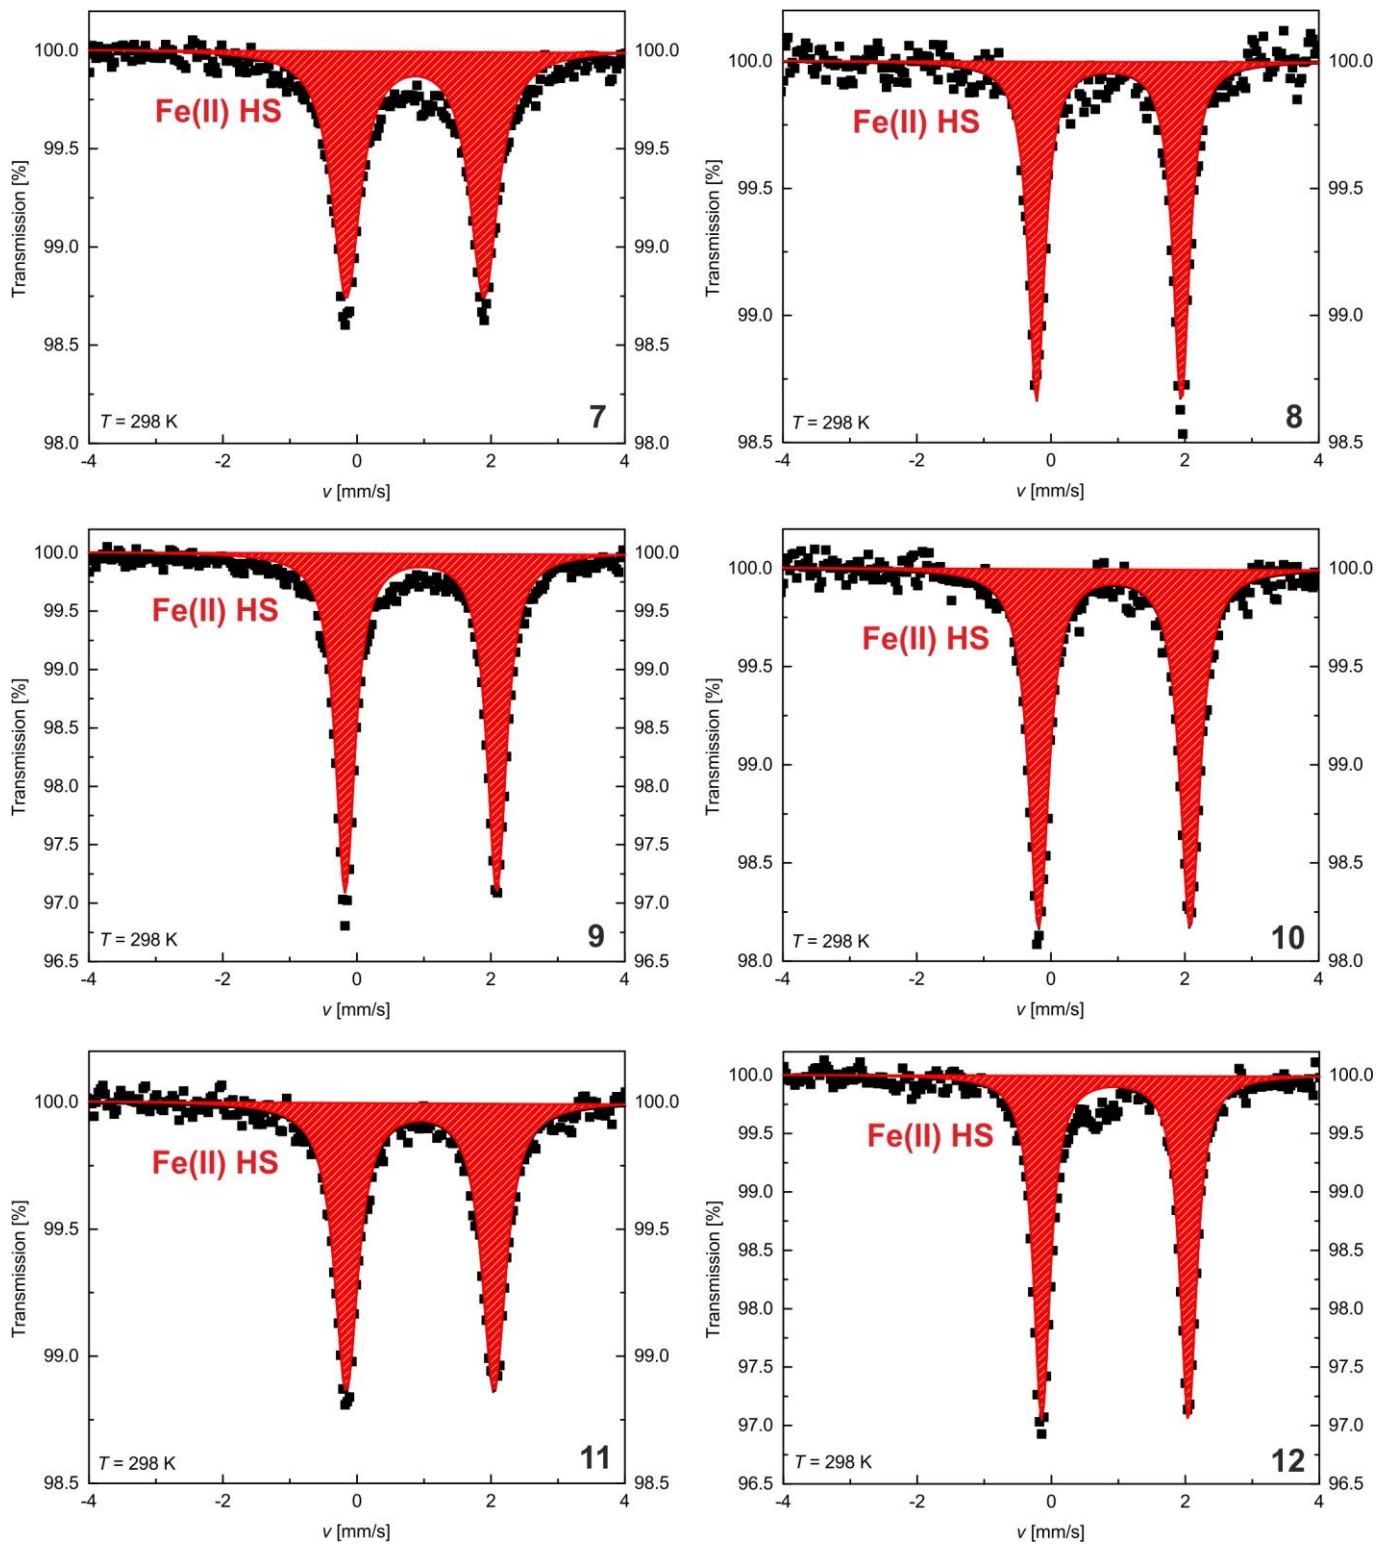

**Figure S12:** Mössbauer spectra of samples 13–15 at room temperature.

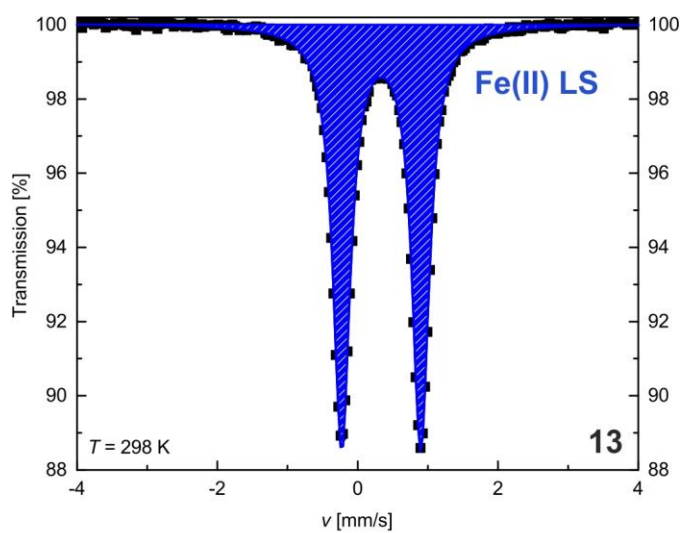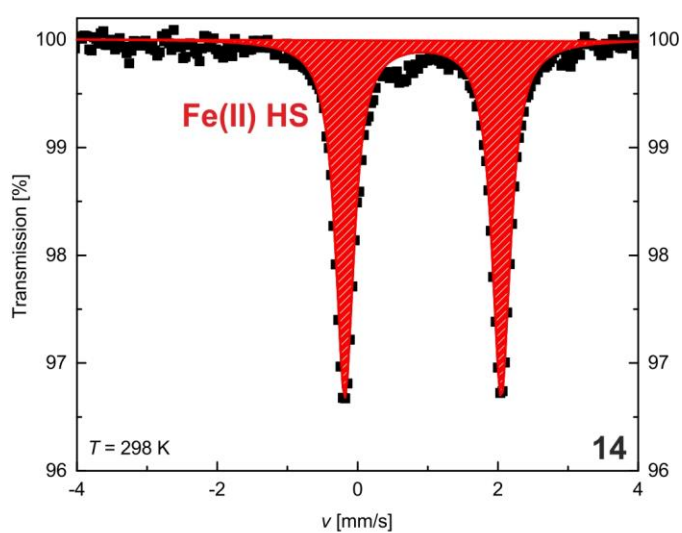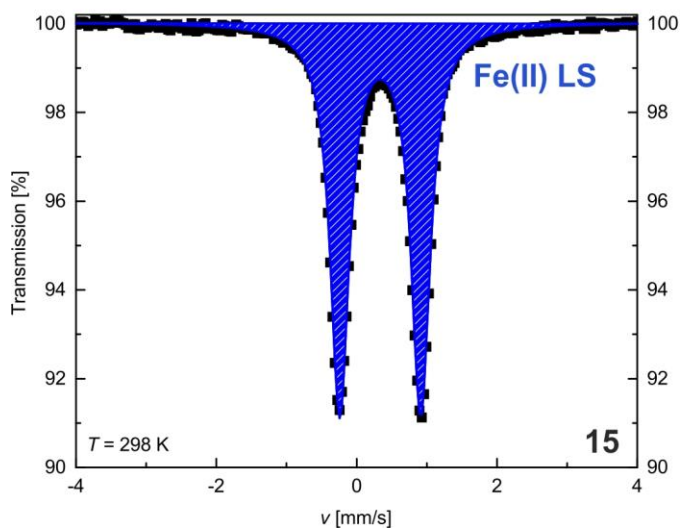

Supplement: c5nj02470f1.pdf [file c5nj02470f1.pdf]
